# Supplementary material for: Photoactivated disinfection procedure for denture stomatitis in diabetic rats
Source: PeerJ. 2024 Apr 30;12:e17268. doi: 10.7717/peerj.17268 (PMC11067891; doi:10.7717/peerj.17268)
Supplement: Supplemental Information 1 [file peerj-12-17268-s001.xlsx]

## Sheet: Sheet1
Palate fungal load between groups of 1d、7d after treatment
infection group 1d	infection group 7d	PAD-1 group 1d	PAD-1 group 7d	PAD-2 group 1d	PAD-2 group 7d	NYS group 1d	NYS group 7d
5.139	4.829	3.875	4.255	3.301	3.477	3.398	3.903
4.903	5.124	2.699	4.322	2.699	3	3	3.301
4.852	4.656	3	5.015	3.176	3.301	2.699	3.301
5.019	4.428	3.301	4.407	2.699	2.699	3.477	3
4.646	4.599	3.176	4.079	3	3.477	3.301	3.398
5.052	4.647	3.653	4.322	3.544	3.544	3.875	3.978
Denture fungal load between groups of 1d、7d after treatment
denture infection group 1d	denture infection group 7d	denture PAD-1 group 1d	denture PAD-1 group 7d	denture PAD-2 group 1d	denture PAD-2 group 7d	denture NYS group 1d	denture NYS group 7d
5.17	5.138	2.699	4.585	3.778	3.929	4.161	4.161
4.721	5.238	3.929	5.485	3.176	3.301	2.699	4
4.887	5.041	3	5.542	3	3	3	4.021
5.081	4.892	3.176	5.027	3.176	3.301	4.243	3.176
4.89	5.112	4.061	4.176	3.301	3.929	3.477	4.061
4.928	4.984	4.021	4.574	3.813	4.342	3.929	4.279
optical density values of IL-17
infection group 1d	infection group 7d	PAD-1 group 1d	PAD-1 group 7d	PAD-2 group 1d	PAD-2 group 7d	NYS group 1d	NYS group 7d
0.101917	0.119017	0.05562	0.089205	0.039255	0.063218	0.036816	0.074101
0.111135	0.110091	0.054694	0.119167	0.041582	0.057303	0.047863	0.066419
0.102248	0.13105	0.062074	0.13904	0.04325	0.068396	0.040026	0.063519
optical density values of TNF-a
infection group 1d	infection group 7d	PAD-1 group 1d	PAD-1 group 7d	PAD-2 group 1d	PAD-2 group 7d	NYS group 1d	NYS group 7d
0.072797	0.075503	0.066927	0.07563	0.064156	0.06493	0.064513	0.064513
0.072252	0.075011	0.065727	0.074203	0.063772	0.065604	0.065604	0.069542
0.071905	0.076262	0.063323	0.069714	0.064075	0.067116	0.06247	0.067478
